# Supplementary material for: Familial co-aggregation and shared heritability between clinically diagnosed neurodevelopmental problems and cardiometabolic conditions: a nationwide register study across three generations
Source: Research Square preprint supplement (doi:10.21203/rs.3.rs-6048644/v1), 2025-08-12
Supplement: Supplementary file 1 [file 1d972a1c927b731de9d05eec.pdf]

## **Supplementary eFigures**

Supplementary eFigure 1. Heritabilities with 95% confidence intervals of all conditions estimated from relatives in different generations

Supplementary eFigure 2. Estimated heritabilities with 95% confidence intervals of ADHD, autism, and cardiometabolic conditions in different age subgroups

Supplementary eFigure 3. Estimated heritabilities with 95% confidence intervals of ADHD, autism, and cardiometabolic conditions from a Dutch cohort Lifelines

Supplementary eFigure 4. Estimated genetic correlations with 95% confidence intervals between ADHD, autism, and cardiometabolic conditions in different age subgroups

Supplementary eFigure 5. Genetic and environmental contributions to the phenotypic covariance with 95% confidence intervals between ADHD, autism and cardiometabolic conditions

Supplementary eFigure 6. Genetic correlations with 95% confidence intervals compared to a previous study among Scandinavians

Supplementary eFigure 7. Heritabilities with 95% confidence intervals compared to a previous family study among Scandinavians

## **Supplementary methods**

### **1. Additional data source (for validation): Lifelines**

#### **1.1 Study population**

#### **1.2 Ascertainment of cardiometabolic conditions**

### **2. Statistical Analysis**

#### **2.1 Familial (co-)aggregation**

#### **2.2 Heritability ( $h^2$ ) and genetic correlation ( $r_g$ )**

#### **2.3 Contributions of genetic and environmental factors**

Supplementary eFigure 1. Heritabilities with 95% confidence intervals of all conditions estimated from relatives in different generations

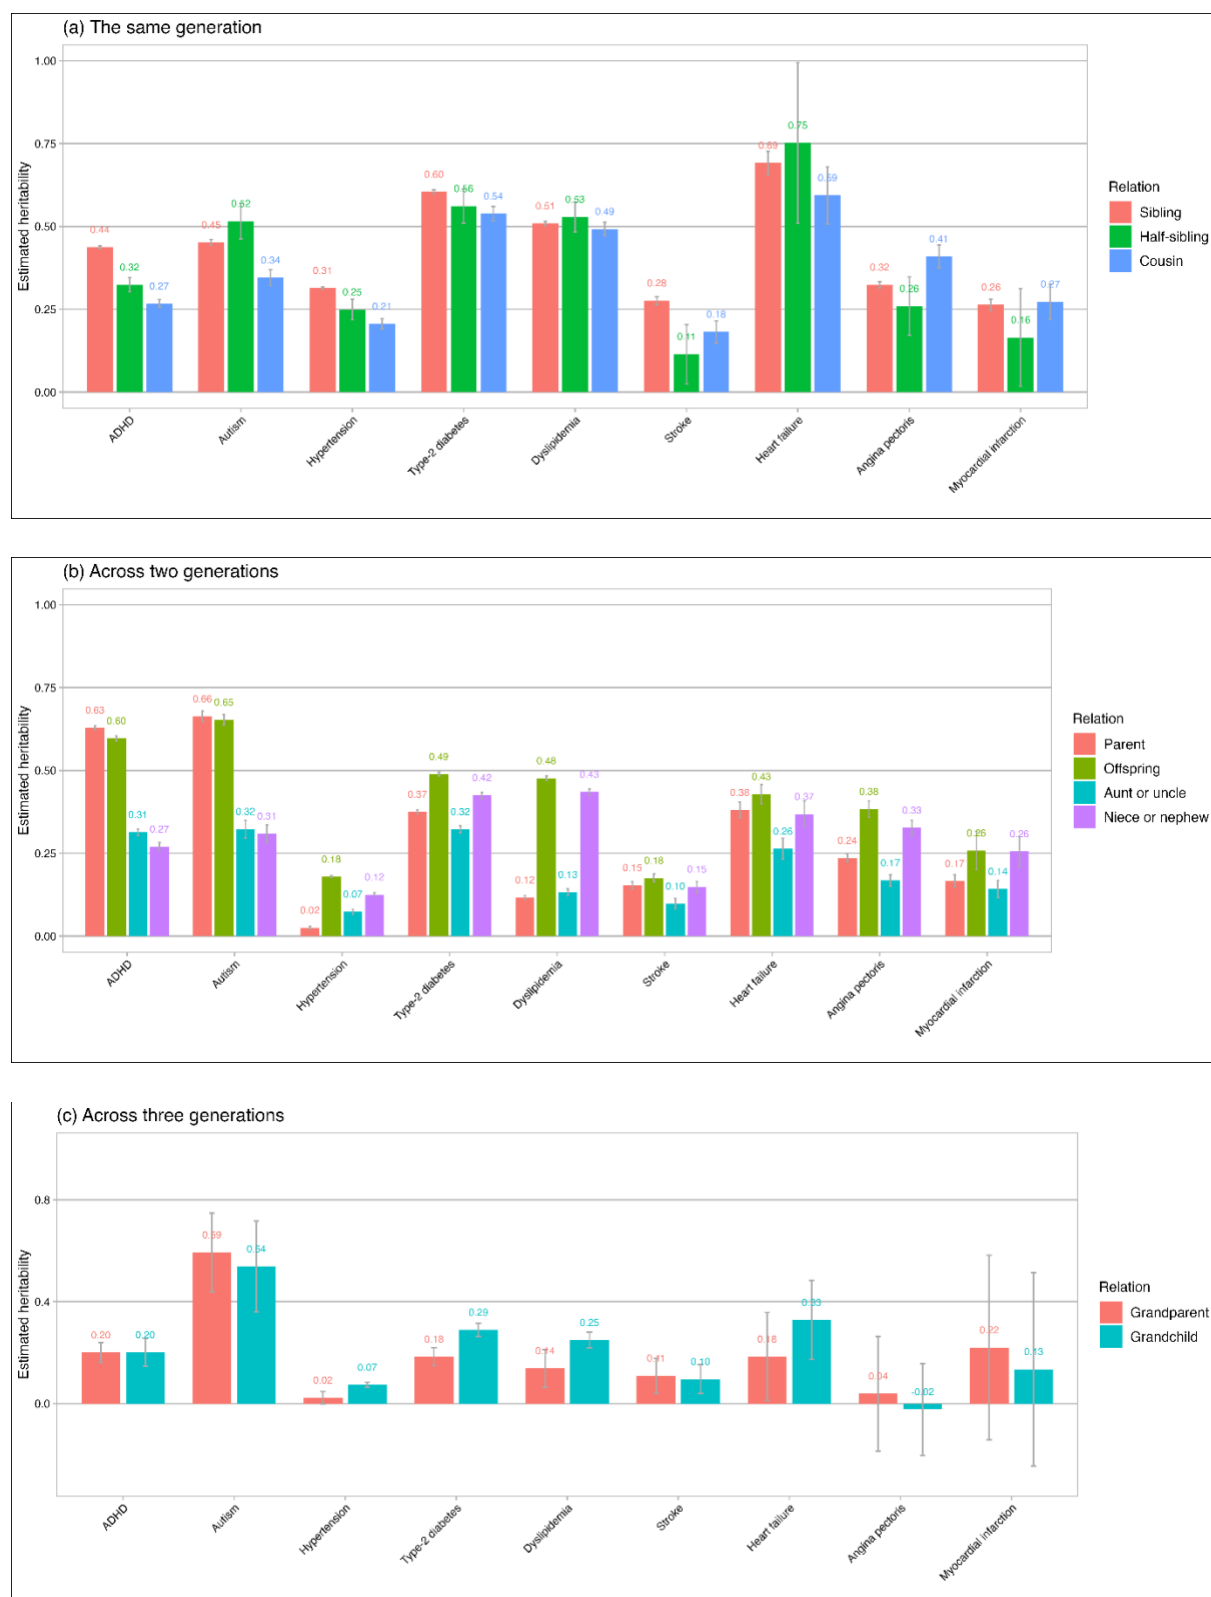

Note:

ADHD, attention-deficit/hyperactivity disorder

Supplementary eFigure 2. Estimated heritabilities with 95% confidence intervals of ADHD, autism, and cardiometabolic conditions in different age subgroups

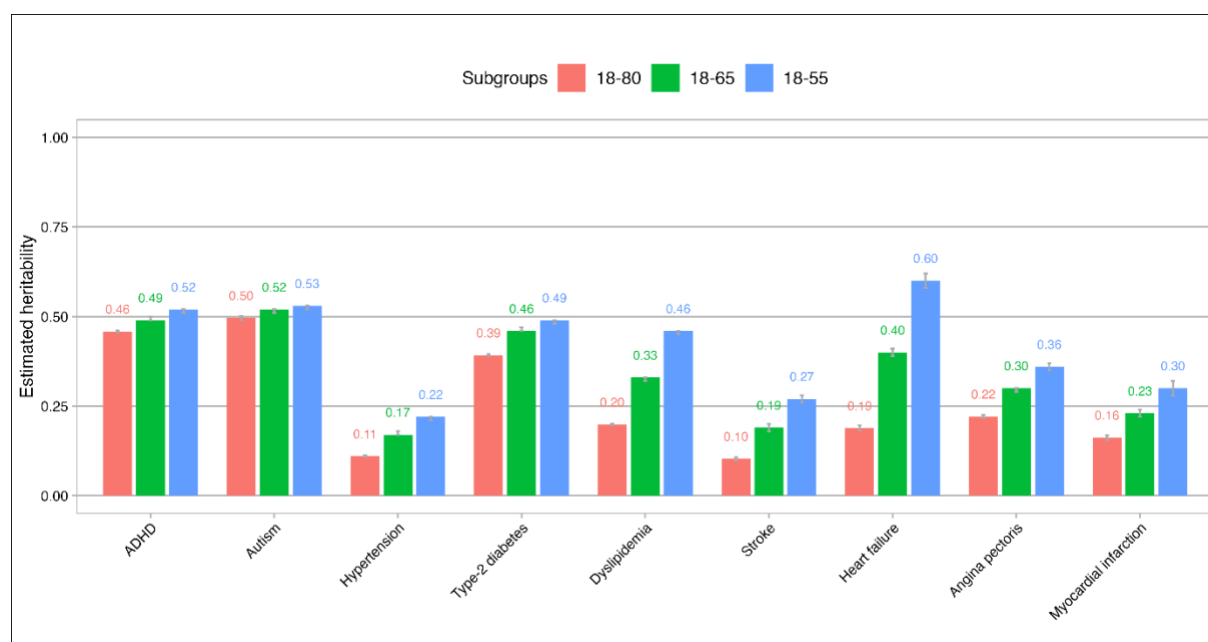

Note:

ADHD, attention-deficit/hyperactivity disorder

Supplementary eFigure 3. Estimated heritabilities with 95% confidence intervals of ADHD, autism, and cardiometabolic conditions from a Dutch cohort Lifelines (for validation)

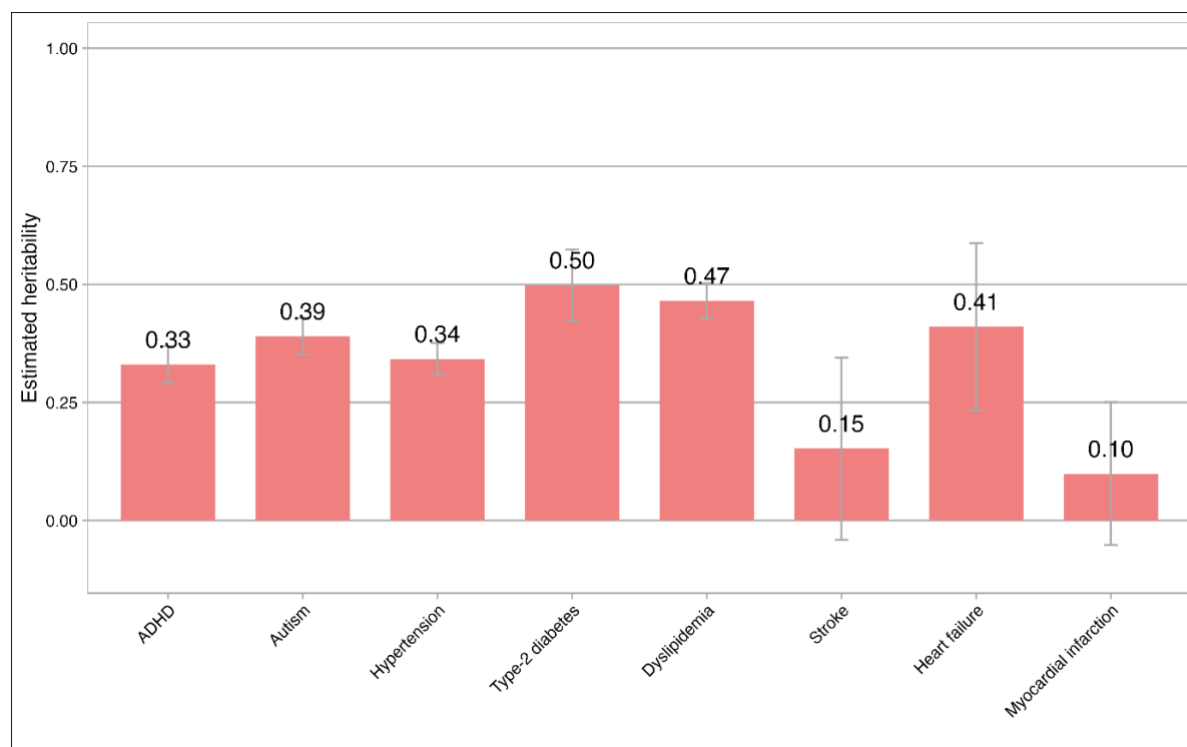

Note: ADHD, attention-deficit/hyperactivity disorder

The results for ADHD and autism were derived from Vos et al.<sup>1</sup> using questionnaire-based assessments of symptoms.

Supplementary eFigure 4. Estimated genetic correlations with 95% confidence intervals between ADHD, autism and cardiometabolic conditions in different age subgroups

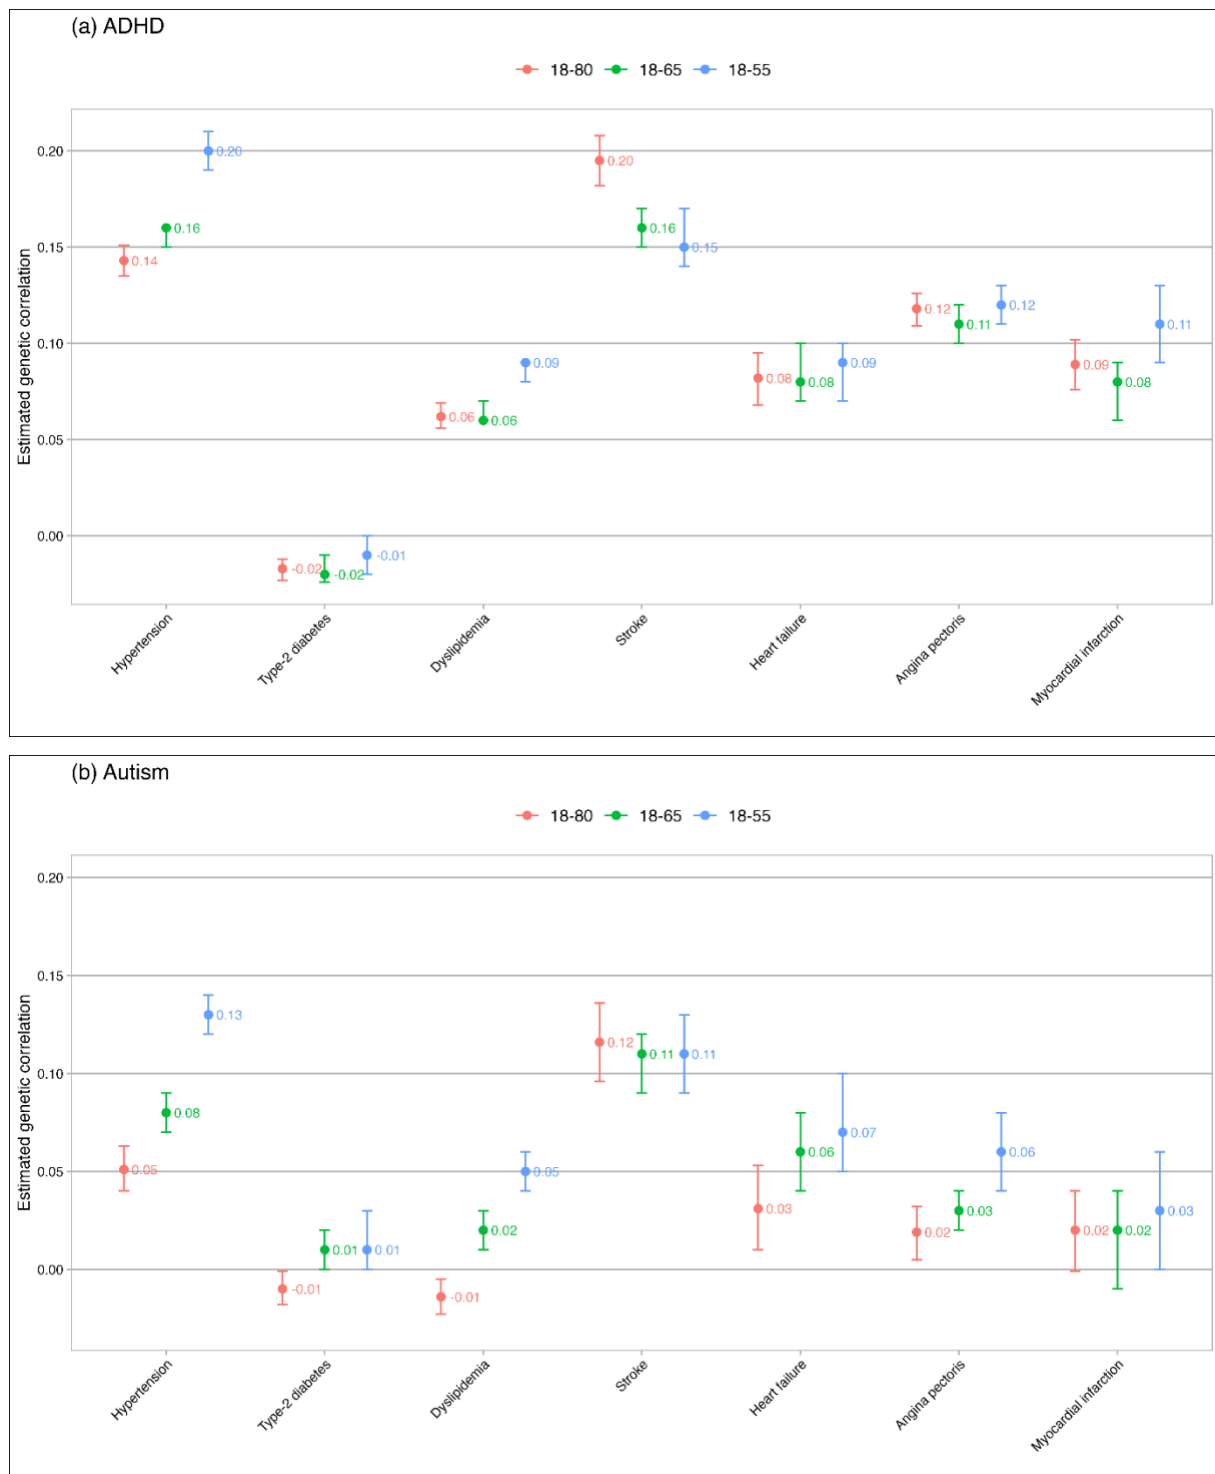

Note:

ADHD, attention-deficit/hyperactivity disorder

Supplementary eFigure 5. Genetic and environmental contributions to the phenotypic covariance with 95% confidence intervals between ADHD, autism and cardiometabolic conditions

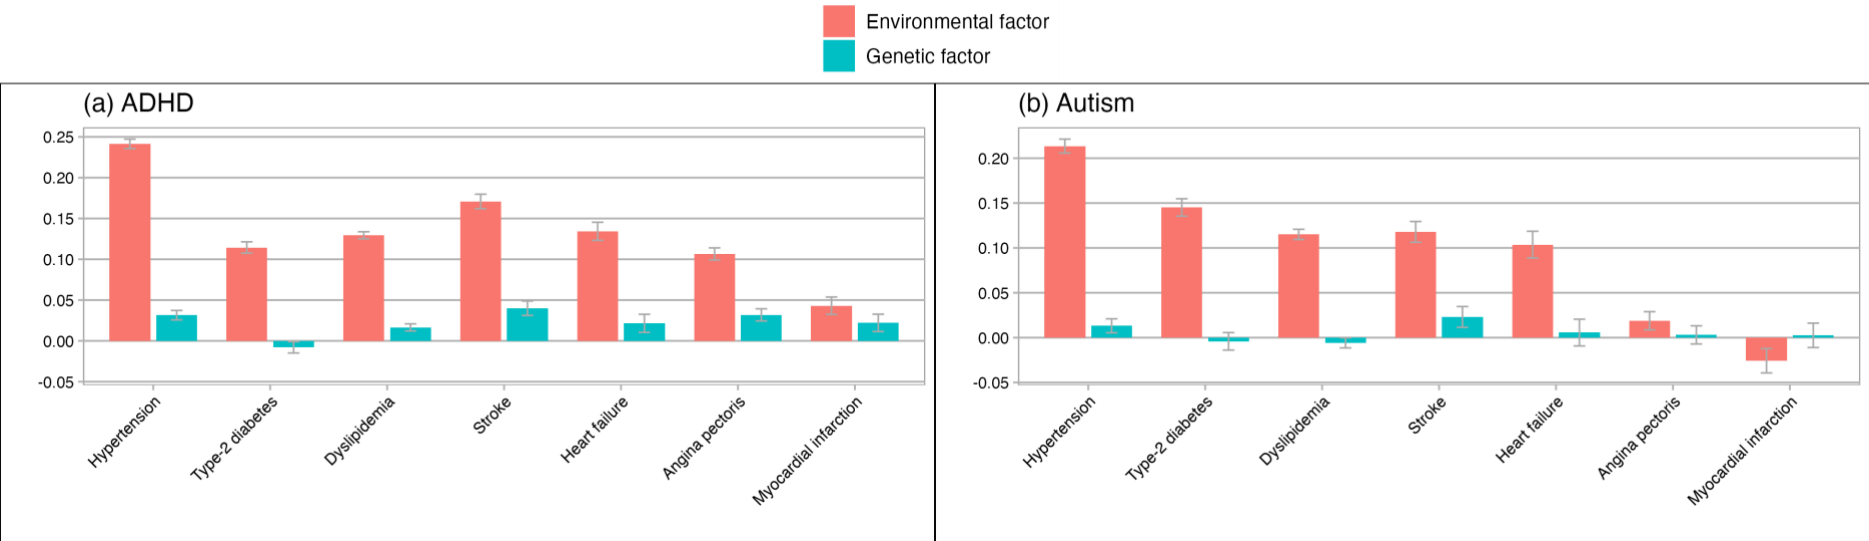

Note:  
ADHD, attention-deficit/hyperactivity disorder.

Supplementary eFigure 6. Genetic correlations with 95% confidence intervals compared to a previous study among Scandinavians<sup>17</sup>

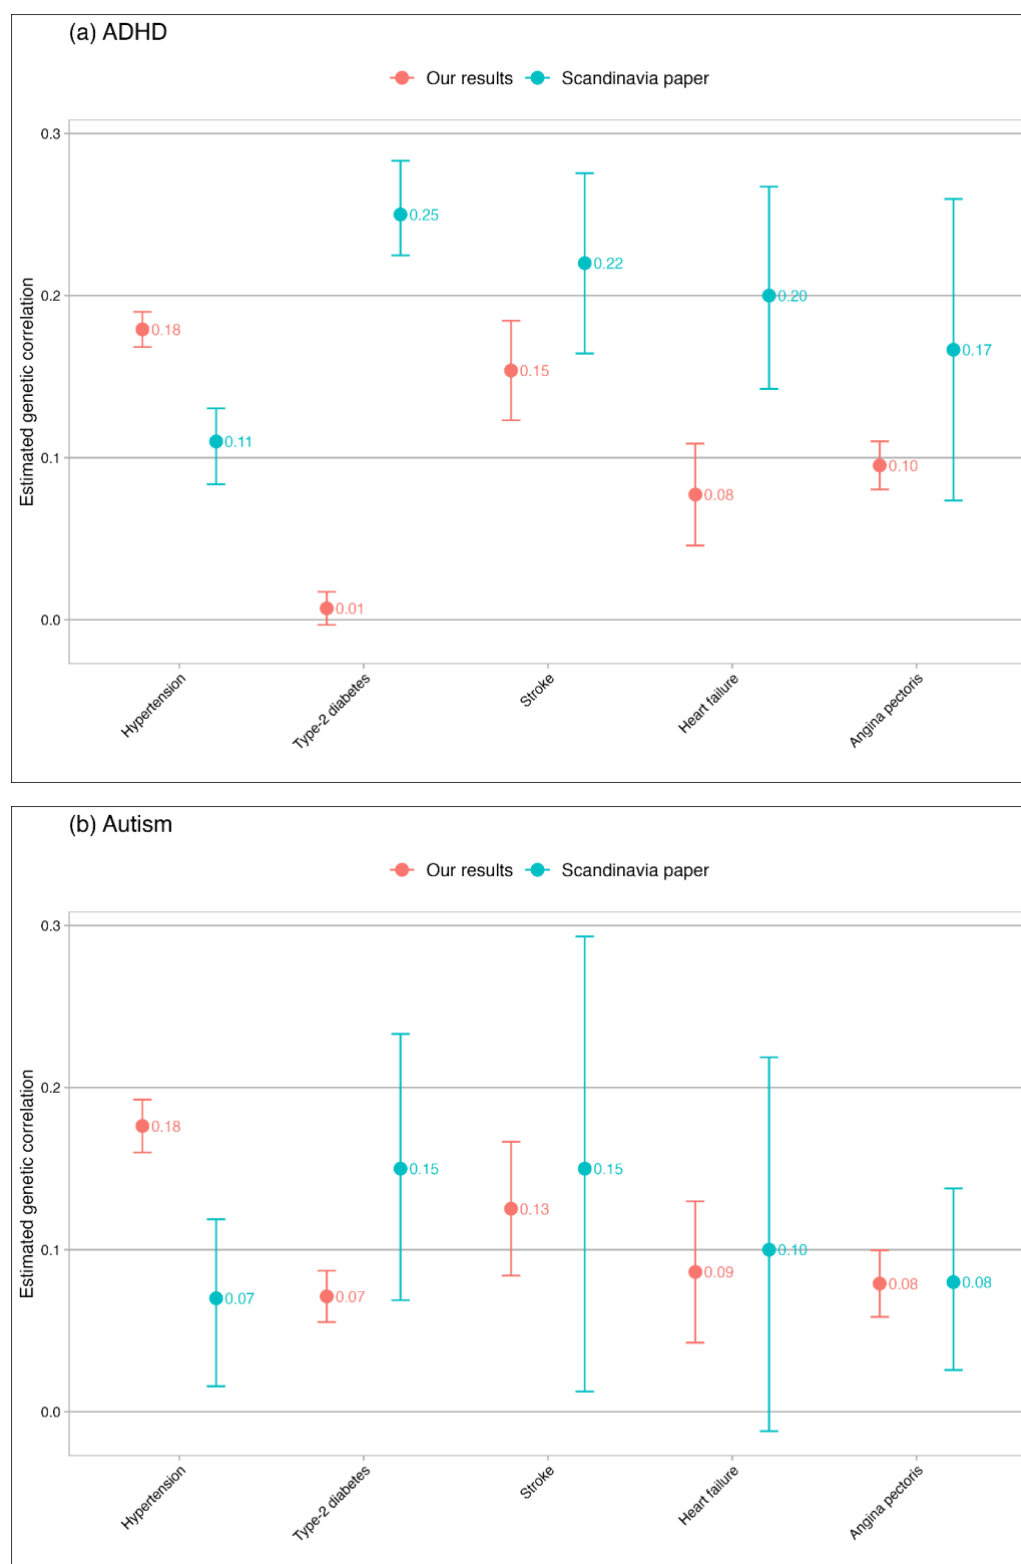

Note:

We used genetic correlations estimated among parent-offsprings in a subgroup aged 18-55 years (birth years 1965-2002), to compare with those reported in the previous Scandinavian study<sup>17</sup>, which estimated the genetic correlations using parent-offspring pairs born between 1981 and 2005.

Supplementary eFigure 7. Heritabilities with 95% confidence intervals compared to a previous family study among Scandinavians<sup>17</sup>

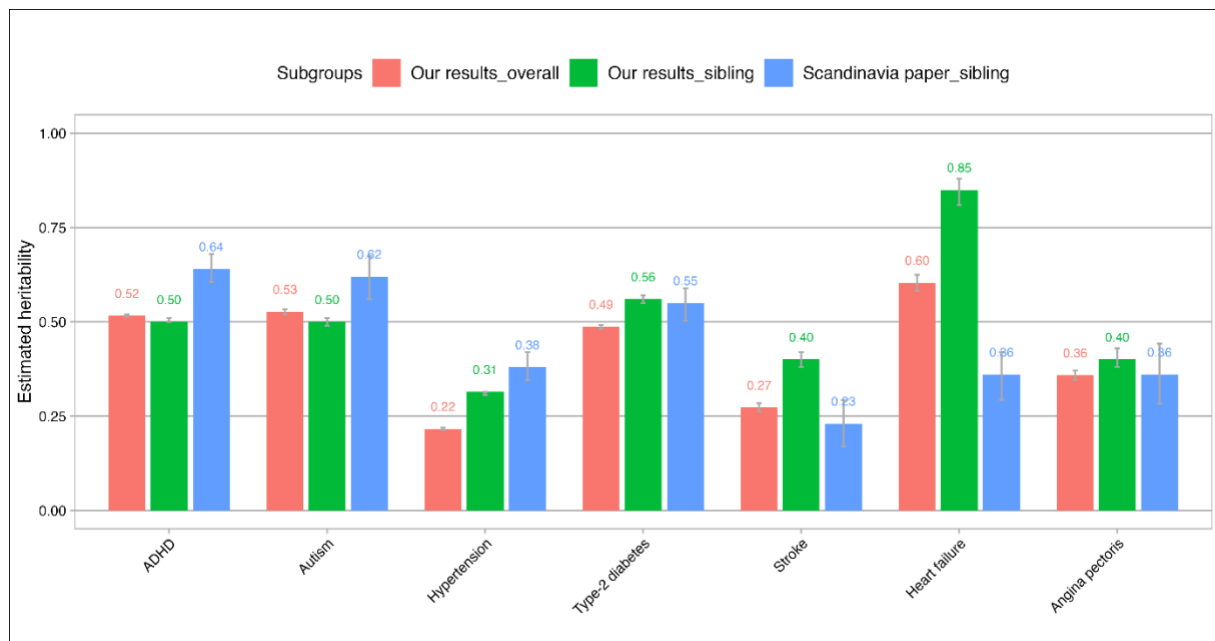

**Note:**

We used heritability estimates in a subgroup aged 18-55 years (birth years 1965-2002), to compare with those reported in the previous Scandinavian study<sup>17</sup>, which estimated the heritability using sibling pairs born between 1965 and 2016.

## Supplementary methods

### 1. Additional data source (for validation): Lifelines

Lifelines is a multi-disciplinary prospective population-based cohort study examining in a unique three-generation design the health and health-related behaviours of 167,729 persons living in the North of the Netherlands.<sup>2,3</sup> It employs a broad range of investigative procedures in assessing the biomedical, socio-demographic, behavioural, physical and psychological factors which contribute to the health and disease of the general population, with a special focus on multi-morbidity and complex genetics. The participants were recruited between 2006 and 2013 at baseline and followed up from 2014 on-ward. The Lifelines protocol was approved by the University Medical Centre Groningen (UMCG) Medical ethical committee under number 2007/152 and all participants signed an informed consent form.<sup>4</sup>

#### *1.1 Study population*

We validated the results of heritabilities of cardiometabolic conditions using the baseline data of Lifelines. All adult participants with relevant data were included. This yielded a total sample of 152,009 adult individuals between 18 and 80 years of age with a mean age of 44.6 years (SD: 12.9) and 41.5% were male. More than half (56.7%) had at least one first-degree relative (1DR) in the dataset, while 13.7% had at least one second-degree relative (2DR) in the dataset. Prevalences of cardiometabolic conditions are shown in **eTable 1** and ranged from 0.5% for heart failure to 32.6% for dyslipidemia.

#### *1.2 Ascertainment of cardiometabolic conditions*

In Lifelines, we identified six cardiometabolic conditions, including hypertension, type-2 diabetes, dyslipidemia, stroke, heart failure, and myocardial infarction.

##### *Hypertension*

Blood pressure was measured using an automatic sphygmomanometer. We defined hypertension based on any of the following criteria:

- 1) systolic blood pressure  $\geq 140$ mmHg;
- 2) diastolic blood pressure  $\geq 90$  mmHg;
- 3) use of blood pressure lowering drugs based on Anatomical Therapeutic Chemical (ATC) codes (C02, C03, C07, C08, C09 and G04CA03).

##### *Type-2 diabetes*

We defined type-2 diabetes based on any of the following criteria:



- 1) use of glucose-lowering drugs based on ATC codes (A10);
- 2) fasting glucose > 7 mmol/l or HbA1c > 6.5%;
- 3) self-reported type-2 diabetes validated by self-reported use of glucose-lowering drugs.

To avoid misclassifying other types of diabetes, participants meeting the above definition of type-2 diabetes but also meeting any of the following criteria were coded as missing:

- 1) participants under 30 years of age who did not self-report diabetes or had missing self-reported diabetes data;
- 2) participants who reported type-1 or other type of diabetes;
- 3) participants with diabetes onset before the age of 30 years or currently under 30 years old who treated their diabetes only with insulin (based on ATC codes or self-report);
- 4) pregnant participants.

#### *Dyslipidemia*

We defined dyslipidemia based on any of the following criteria:<sup>5-8</sup>

- 1) total cholesterol  $\geq$  6.5 mmol/L;
- 2) low-density lipoprotein cholesterol > 4.91 mmol/L;
- 3) high-density lipoprotein cholesterol < 1.03 mmol/L (men) or < 1.29 mmol/L (women);
- 4) triglycerides  $\geq$  2.3 mmol/L;
- 5) use of lipid modifying drugs based on ATC code C10.

#### *Stroke*

We defined stroke as self-reported stroke.

#### *Heart failure*

We defined heart failure as self-reported heart failure validated by either supporting drug use based on ATC codes (C09, C03DA), or self-reported therapy for heart failure (medication, pacemaker or heart transplant).

#### *Myocardial infarction*

We defined myocardial infarction as self-reported myocardial infarction with drug use (platelet aggregation inhibitors/antithrombotic drugs) or electrocardiography signs corresponding to myocardial infarction.<sup>9</sup>

## 2. Statistical Analysis

All statistical analyses were conducted for main results using CBS data. The analyses for familial aggregation and heritability of cardiometabolic conditions were conducted in Lifelines for validation.

### 2.1 Familial (co-)aggregation

To examine the familial (co-)aggregation, recurrence risk ratio ( $\lambda_R$ ) was estimated.  $\lambda_R$  is the ratio of the prevalence of the condition in relatives of affected participants (e.g., siblings) compared to the prevalence in the general population,<sup>10</sup> with  $\lambda_R > 1$  indicating positive familial (co-)aggregation (e.g., elevated risk in those with positive family history).

$$\lambda_R = \frac{K_r}{K} \quad (\text{A1})$$

Where  $K$  is the prevalence of the condition in the whole study population, and  $K_r$  is the prevalence in individuals with affected relatives.

We employed plug-in methods to estimate the marginal  $K$  and  $K_r$ . First, we fitted logistic regression models regressing the condition outcome on the exposure (e.g., whether a sibling was affected by the condition). Models were adjusted for sex, number of relatives, and age (modeled as age and age<sup>2</sup> to account for non-linear effects) of both the individual and the sibling. The interaction between exposure and age (age and age<sup>2</sup>) and the interaction between exposure and sex were included to account for effect modifiers.

$$\log\left(\frac{\Pr(C=1)}{1-\Pr(C=1)}\right) = \beta_0 + \beta_1 X_1 + \beta_2 X_2 + \beta_3 X_3 + \beta_4 X_4 + \beta_5 X_5 + \beta_6 X_6 + \beta_7 X_7 + \beta_8 X_8 + \beta_9 X_9 + \beta_{10} X_{10} \quad (\text{A2})$$

Where  $C$  = condition status of the individual (1 for cases, 0 for controls);  $X_1$  = condition status of the relative (1 if the relative is affected, 0 if not);  $X_2$  = sex of the individual;  $X_3$  = number of the type of relatives;  $X_4$  = age of the individual;  $X_5$  = age<sup>2</sup> of the individual;  $X_6$  = age of the relative (if there is more than one relative, e.g., siblings, the mean age was used);  $X_7$  = age<sup>2</sup> of the relative;  $X_8$  = condition status of the relative  $\times$  age of the individual;  $X_9$  = condition status of the relative  $\times$  age<sup>2</sup> of the individual;  $X_{10}$  = condition status of the relative  $\times$  sex of the individual.

Second, we estimated the average prevalence of the condition among the total population by plugging-in the fitted logistic regression to the observed total population; and the marginal prevalence of the condition among individuals with an affected sibling by plugging-in the fitted logistic regression to the observed total population with the exposure set to 1 for all observations.<sup>11,12</sup> To account for familial clustering and the resulting within-family correlations, 95% confidence intervals (CIs) were estimated for each prevalence using a robust sandwich estimator.<sup>13</sup> Standard errors ( $SE$ ) of  $\lambda_R$  were estimated using the delta method.<sup>14</sup> These analyses were conducted using the R package “marginaleffects”.<sup>15,16</sup>

## 2.2 Heritability ( $h^2$ ) and genetic correlation ( $r_g$ )

We used equation B1 to estimate  $h_{relative}^2$  and equation B2 to calculate the approximate  $SE$  in situations where individuals and their relatives have the same condition, and individuals have one affected relative.<sup>17</sup> These methods are generalized for scenarios where individuals have both parents affected by the same condition, as shown in B3 for  $h^2$  and B4 for  $SE$ .

$$h^2 = \frac{T - T_R \times \sqrt{1 - (1 - \frac{T}{i}) \times (T^2 - T_R^2)}}{a_R \times (i + (i - T) \times T_R^2)} \quad (B1)$$

$$SE(h^2) \approx \frac{1}{a_R} \times \sqrt{\left[ \frac{s.e(K)^2}{y^2} \times \left( \frac{1}{i} + a_R \times h^2 \times (i - T) \right)^2 + \frac{s.e(K_R)^2}{i^2 \times y_R^2} \right]} \quad (B2)$$

$$h^2 = \frac{2T - \sqrt{2}T_R \times \sqrt{2 - (1 - \frac{T}{i}) \times (T^2 - T_R^2)}}{2i + (i - T) \times T_R^2} \quad (B3)$$

$$SE(h^2) \approx \sqrt{\left[ \frac{s.e(K)^2}{y^2} \times \left( \frac{1}{i} + h^2 \times (i - T) \right)^2 + \frac{s.e(K_R)^2}{i^2 \times y_R^2} \right]} \quad (B4)$$

Where  $T$  is the liability threshold of the condition in the general population,  $T_R$  is the liability threshold of the condition based on affected family members,  $i$  is the mean liability of the condition in the population calculated as  $i = \frac{y}{K}$ ,  $K$  is the lifetime probability of the condition in the population and  $y$  is the height of the normal curve at threshold  $T$ . Under the liability threshold model, those with phenotypic liability,  $Z \sim N(0,1)$ , greater than the threshold  $T$  have the condition such that distribution  $p(Z > T) = K$ .  $a_R$  is the average coefficient of additive

genetic relationship between relatives (0.5 for first-, 0.25 for second-, and 0.125 for third-degree relatives),  $K_R$  is the lifetime probability of the condition in individuals with affected family members.

We used equation C1 to estimate shared heritability  $r_{cf}h_ch_{f,relative}$  and equation C2 to estimate the approximate  $SE$  for situations where individuals have one condition ( $c$ ), their relatives have the other condition ( $f$ ), and individuals have one affected relative.

Equations C3 and C4 are for situations in which individuals have both parents affected by the condition ( $f$ ).

$$r_{cf}h_ch_f = \frac{T_c - T_{cf} \sqrt{1 - (1 - \frac{T_f}{i_f})(T_c^2 - T_{cf}^2)}}{a_R(i_f + (i_f - T_f)T_{cf}^2)} \quad (C1)$$

$$SE(r_{cf}h_ch_f) \approx \frac{1}{a_R} \sqrt{\left[ \frac{s.e_{K_f}^2}{y_f^2} \left( \frac{1}{i_f} + a_R r_{cf}h_ch_f(i_f - T_f) \right)^2 + \frac{1}{i_f^2} \left( \frac{s.e_{K_c}^2}{y_c^2} + \frac{s.e_{K_{cf}}^2}{y_{cf}^2} \right) \right]} \quad (C2)$$

$$r_{cf}h_ch_f = \frac{2T_c - \sqrt{2}T_{cf} \sqrt{2 - (1 - \frac{T_f}{i_f})(T_c^2 - T_{cf}^2)}}{2i_f + (i_f - T_f)T_{cf}^2} \quad (C3)$$

$$SE(r_{cf}h_ch_f) \approx \sqrt{\left[ \frac{s.e_{K_f}^2}{y_f^2} \left( \frac{1}{i_f} + r_{cf}h_ch_f(i_f - T_f) \right)^2 + \frac{1}{i_f^2} \left( \frac{s.e_{K_c}^2}{y_c^2} + \frac{s.e_{K_{cf}}^2}{y_{cf}^2} \right) \right]} \quad (C4)$$

We used equations D1 and D2 to estimate genetic correlation  $r_g$  and  $SE$  for each type of relative.

$$r_g = \frac{r_{cf}h_ch_f}{h_ch_f} \quad (D1)$$

$$SE(r_g) \approx r_g \sqrt{\frac{s.e(r_{cf}h_ch_f)^2}{r_{cf}h_ch_f^2} + \frac{(h_ch_f \sqrt{\frac{0.25 \times (h_c^2 h_f^2 \sqrt{\frac{s.e(h_c^2)^2}{h_c^2} + \frac{s.e(h_f^2)^2}{h_f^2}})^2}{(h_c^2 h_f^2)^2}})}{h_c^2 h_f^2}} \quad (D2)$$

### 2.3 Contributions of genetic and environmental factors

We used equations E1 and E2 to estimate phenotypic (tetrachoric) correlations  $r_p$ , and equations E2, E3, and E4 to calculate the genetic factor  $G$  and environmental factor  $E$  for each type of relative.

$$r_p = \frac{\frac{3}{OR^4-1}}{\frac{3}{OR^4+1}} \quad (E1)^{18}$$

Where  $OR$  was estimated from logistic regressions.

$$\log\left(\frac{\Pr(C=1)}{1-\Pr(C=1)}\right) = \beta_0 + \beta_1 X_1 + \beta_2 X_2 + \beta_3 X_3 + \beta_4 X_4 \quad (E2)$$

Where  $C$  = condition status of the individual (e.g., 1 for having hypertension, 0 for not having hypertension);  $X_1$  = the other condition status of the individual (e.g., 1 for having autism spectrum disorder, 0 for not having autism spectrum disorder);  $X_2$  = sex of the individual;  $X_3$  = age of the individual;  $X_4$  = age<sup>2</sup> of the individual.

$$E = cov(E_c, E_f) = cov(P_c, P_f) - G \quad (E3)$$

$$cov(P_c, P_f) = r_p \times \sqrt{Var(P_c) \times Var(P_f)} \quad (E4)$$

$$G = cov(G_c, G_f) = r_g \times \sqrt{Var(G_c) \times Var(G_f)}$$

$$Var(G) = h^2 \times Var(P) \quad (E5)$$

In liability threshold model,  $Var(P_c) = Var(P_f) = 1$ .  $r_g$  is genetic correlation between one condition ( $c$ ) and the other condition ( $f$ ) calculated from equation D1,  $h^2$  is the heritability calculated from equation B1.

## References

1. Vos M, Wang R, Rommelse NN, Snieder H, Larsson H, Hartman CA. Familial co-aggregation and shared familiarity among neurodevelopmental problems and with aggressive behavior, depression, anxiety, and substance use. *Psychological Medicine*. 2024;1-13.
2. Sijtsma A, Rienks J, van der Harst P, Navis G, Rosmalen JGM, Dotinga A. Cohort Profile Update: Lifelines, a three-generation cohort study and biobank. *International Journal of Epidemiology*. Dec 13 2021;51(5):E295-E302. doi:10.1093/ije/dyab257
3. Scholtens S, Smidt N, Swertz MA, et al. Cohort Profile: LifeLines, a three-generation cohort study and biobank. *International Journal of Epidemiology*. Aug 2015;44(4):1172-1180. doi:10.1093/ije/dyu229
4. Stolk RP, Rosmalen JG, Postma DS, et al. Universal risk factors for multifactorial diseases: LifeLines: a three-generation population-based study. *Eur J Epidemiol*. 2008;23(1):67-74. doi:10.1007/s10654-007-9204-4
5. Mach F, Baigent C, Catapano AL, et al. 2019 ESC/EAS Guidelines for the management of dyslipidaemias: lipid modification to reduce cardiovascular risk. *Eur Heart J*. Jan 1 2020;41(1):111-188. doi:10.1093/eurheartj/ehz455
6. Triatin RD, Chen Z, Ani A, et al. Familial co-aggregation and shared genetics of cardiometabolic disorders and traits: data from the multi-generational Lifelines Cohort Study. *Cardiovascular Diabetology*. 2023;22(1):282.
7. Clinic; C. Hypercholesterolemia. 2025. <https://my.clevelandclinic.org/health/diseases/23921-hypercholesterolemia>
8. Bilen O, Virani SS, Nambi V. Hyperlipidemia. 2018;
9. van der Ende MY, Hartman MHT, Schurer RAJ, et al. Prevalence of electrocardiographic unrecognized myocardial infarction and its association with mortality. *Int J Cardiol*. Sep 15 2017;243:34-39. doi:10.1016/j.ijcard.2017.05.063
10. Risch N. Linkage strategies for genetically complex traits. I. Multilocus models. *American journal of human genetics*. 1990;46(2):222.
11. Muller CJ, MacLehose RF. Estimating predicted probabilities from logistic regression: different methods correspond to different target populations. *Int J Epidemiol*. Jun 2014;43(3):962-70. doi:10.1093/ije/dyu029
12. Dickerman BA, Hernan MA. Counterfactual prediction is not only for causal inference. *Eur J Epidemiol*. Jul 2020;35(7):615-617. doi:10.1007/s10654-020-00659-8
13. Zeileis A, Köll S, Graham N. Various Versatile Variances: An Object-Oriented Implementation of Clustered Covariances in R. *Journal of Statistical Software*. Oct 2020;95(1):1-36. doi:10.18637/jss.v095.i01
14. Oehlert GW. A note on the delta method. *The American Statistician*. 1992;46(1):27-29.
15. Arel-Bundock V GN, Heiss A (Forthcoming). How to Interpret Statistical Models Using `marginalEffects` in R and Python. *Journal of Statistical Software*.
16. Vincent Arel-Bundock NG, Andrew Heiss. Marginal Effects Zoo. <https://marginaleffects.com/CITATION.html>
17. Wray NR, Gottesman, II. Using summary data from the danish national registers to estimate heritabilities for schizophrenia, bipolar disorder, and major depressive disorder. *Front Genet*. 2012;3:118. doi:10.3389/fgene.2012.00118
18. Digby PGN. Approximating the Tetrachoric Correlation-Coefficient. *Biometrics*. 1983;39(3):753-757. doi:10.2307/2531104
